# Supplementary material
Source: Springer Nature journal article supplement (https://www.springermedizin.de/resource/supplementary/12874_2012_856_MOESM2_ESM.pdf/9432686)
Supplement: MOESM2 [file 9432686]

Table 1: Empirical **bias** of  $\hat{\beta}_1$  (with empirical **MSE** in parentheses) in the linear model when between-group contrast is 0.3.

| $\delta = 0.3$                                    | $\sigma_b^2$ | $\sigma_\eta^2$ | Naive        | GBS          | CGBS         | CEM          |
|---------------------------------------------------|--------------|-----------------|--------------|--------------|--------------|--------------|
| With full values ( $n_y = 30$ and $n_x = 30$ )    |              |                 |              |              |              |              |
| 0.3                                               | 0.25         |                 | 0.356(0.020) | 0.025(0.030) | 0.023(0.031) | 0.015(0.020) |
|                                                   | 0.50         |                 | 0.522(0.031) | 0.041(0.031) | 0.033(0.032) | 0.012(0.025) |
|                                                   | 0.75         |                 | 0.621(0.040) | 0.057(0.033) | 0.038(0.034) | 0.012(0.028) |
| 0.6                                               | 0.25         |                 | 0.255(0.012) | 0.026(0.029) | 0.020(0.030) | 0.011(0.011) |
|                                                   | 0.50         |                 | 0.402(0.020) | 0.042(0.030) | 0.030(0.031) | 0.009(0.014) |
|                                                   | 0.75         |                 | 0.501(0.027) | 0.062(0.031) | 0.038(0.033) | 0.005(0.018) |
| 0.9                                               | 0.25         |                 | 0.198(0.009) | 0.027(0.028) | 0.019(0.030) | 0.009(0.008) |
|                                                   | 0.50         |                 | 0.327(0.014) | 0.045(0.029) | 0.030(0.031) | 0.008(0.010) |
|                                                   | 0.75         |                 | 0.420(0.020) | 0.072(0.032) | 0.038(0.033) | 0.005(0.012) |
| With missing values ( $n_y = 30$ and $n_x = 20$ ) |              |                 |              |              |              |              |
| 0.3                                               | 0.25         |                 | –            | 0.012(0.043) | 0.003(0.044) | 0.021(0.032) |
|                                                   | 0.50         |                 | –            | 0.028(0.047) | 0.003(0.052) | 0.035(0.042) |
|                                                   | 0.75         |                 | –            | 0.057(0.048) | 0.005(0.067) | 0.045(0.048) |
| 0.6                                               | 0.25         |                 | –            | 0.024(0.044) | 0.008(0.046) | 0.015(0.018) |
|                                                   | 0.50         |                 | –            | 0.048(0.047) | 0.001(0.060) | 0.029(0.026) |
|                                                   | 0.75         |                 | –            | 0.071(0.053) | 0.018(0.092) | 0.041(0.033) |
| 0.9                                               | 0.25         |                 | –            | 0.039(0.043) | 0.011(0.049) | 0.012(0.011) |
|                                                   | 0.50         |                 | –            | 0.061(0.049) | 0.004(0.071) | 0.023(0.016) |
|                                                   | 0.75         |                 | –            | 0.078(0.060) | 0.040(0.143) | 0.035(0.021) |
| With missing values ( $n_y = 30$ and $n_x = 10$ ) |              |                 |              |              |              |              |
| 0.3                                               | 0.25         |                 | –            | 0.058(0.046) | 0.021(0.046) | 0.064(0.050) |
|                                                   | 0.50         |                 | –            | 0.113(0.048) | 0.031(0.052) | 0.079(0.075) |
|                                                   | 0.75         |                 | –            | 0.169(0.049) | 0.033(0.061) | 0.089(0.083) |
| 0.6                                               | 0.25         |                 | –            | 0.092(0.045) | 0.023(0.050) | 0.018(0.035) |
|                                                   | 0.50         |                 | –            | 0.147(0.047) | 0.028(0.058) | 0.051(0.052) |
|                                                   | 0.75         |                 | –            | 0.204(0.049) | 0.030(0.066) | 0.079(0.062) |
| 0.9                                               | 0.25         |                 | –            | 0.132(0.044) | 0.022(0.054) | 0.003(0.026) |
|                                                   | 0.50         |                 | –            | 0.184(0.046) | 0.026(0.061) | 0.028(0.036) |
|                                                   | 0.75         |                 | –            | 0.239(0.050) | 0.021(0.077) | 0.053(0.046) |

Empirical **bias** of  $\hat{\beta}_1$  (with empirical **MSE** in parentheses) in 200 simulations when the disease model is **linear**, estimated by different methods: naive, group-based strategy (GBS), constrained group-based strategy (CGBS), and Monte Carlo EM(CEM).  $G$ : number of groups;  $n_y$ : number of outcomes in each group;  $n_x$ : number of exposures measured;  $\delta$ : between-group contrast;  $\sigma_b^2$ : between-subject variability;  $\sigma_\eta^2$ : measurement-error variability; bias =  $\frac{|\hat{\beta}_1 - \beta_1|}{\beta_1}$ ; MSE =  $E[(\hat{\beta}_1 - \beta_1)^2]$ .

Table 2: Empirical **bias** of  $\hat{\beta}_1$  (with empirical **MSE** in parentheses) in the linear model when between-group contrast is 0.5.

| $\delta = 0.5$                                    | $\sigma_b^2$ | $\sigma_\eta^2$ | Naive        | GBS          | CGBS         | CEM          |
|---------------------------------------------------|--------------|-----------------|--------------|--------------|--------------|--------------|
| With full values ( $n_y = 30$ and $n_x = 30$ )    |              |                 |              |              |              |              |
| 0.3                                               | 0.25         |                 | 0.249(0.012) | 0.013(0.012) | 0.013(0.012) | 0.012(0.010) |
|                                                   | 0.50         |                 | 0.395(0.019) | 0.020(0.012) | 0.019(0.012) | 0.010(0.011) |
|                                                   | 0.75         |                 | 0.493(0.026) | 0.026(0.012) | 0.024(0.012) | 0.008(0.012) |
| 0.6                                               | 0.25         |                 | 0.195(0.008) | 0.013(0.011) | 0.013(0.011) | 0.011(0.007) |
|                                                   | 0.50         |                 | 0.323(0.013) | 0.020(0.012) | 0.018(0.012) | 0.010(0.008) |
|                                                   | 0.75         |                 | 0.415(0.019) | 0.026(0.012) | 0.023(0.012) | 0.009(0.009) |
| 0.9                                               | 0.25         |                 | 0.161(0.006) | 0.014(0.011) | 0.013(0.011) | 0.009(0.006) |
|                                                   | 0.50         |                 | 0.273(0.010) | 0.019(0.011) | 0.018(0.012) | 0.009(0.006) |
|                                                   | 0.75         |                 | 0.358(0.015) | 0.026(0.012) | 0.022(0.012) | 0.009(0.007) |
| With missing values ( $n_y = 30$ and $n_x = 20$ ) |              |                 |              |              |              |              |
| 0.3                                               | 0.25         |                 | –            | 0.002(0.014) | 0.002(0.014) | 0.012(0.013) |
|                                                   | 0.50         |                 | –            | 0.007(0.015) | 0.005(0.015) | 0.019(0.015) |
|                                                   | 0.75         |                 | –            | 0.012(0.017) | 0.008(0.017) | 0.026(0.017) |
| 0.6                                               | 0.25         |                 | –            | 0.006(0.014) | 0.005(0.014) | 0.012(0.010) |
|                                                   | 0.50         |                 | –            | 0.011(0.016) | 0.007(0.016) | 0.020(0.013) |
|                                                   | 0.75         |                 | –            | 0.015(0.018) | 0.009(0.018) | 0.027(0.015) |
| 0.9                                               | 0.25         |                 | –            | 0.010(0.015) | 0.007(0.015) | 0.011(0.008) |
|                                                   | 0.50         |                 | –            | 0.015(0.017) | 0.009(0.017) | 0.018(0.010) |
|                                                   | 0.75         |                 | –            | 0.019(0.018) | 0.010(0.019) | 0.025(0.012) |
| With missing values ( $n_y = 30$ and $n_x = 10$ ) |              |                 |              |              |              |              |
| 0.3                                               | 0.25         |                 | –            | 0.017(0.017) | 0.010(0.017) | 0.034(0.018) |
|                                                   | 0.50         |                 | –            | 0.037(0.018) | 0.020(0.018) | 0.054(0.021) |
|                                                   | 0.75         |                 | –            | 0.057(0.019) | 0.029(0.019) | 0.069(0.025) |
| 0.6                                               | 0.25         |                 | –            | 0.028(0.017) | 0.016(0.017) | 0.028(0.016) |
|                                                   | 0.50         |                 | –            | 0.048(0.019) | 0.023(0.018) | 0.048(0.020) |
|                                                   | 0.75         |                 | –            | 0.068(0.020) | 0.030(0.020) | 0.066(0.024) |
| 0.9                                               | 0.25         |                 | –            | 0.040(0.018) | 0.021(0.018) | 0.020(0.013) |
|                                                   | 0.50         |                 | –            | 0.060(0.019) | 0.027(0.019) | 0.037(0.017) |
|                                                   | 0.75         |                 | –            | 0.080(0.020) | 0.032(0.021) | 0.053(0.021) |

Empirical **bias** of  $\hat{\beta}_1$  (with empirical **MSE** in parentheses) in 200 simulations when the disease model is **linear**, estimated by different methods: naive, group-based strategy (GBS), constrained group-based strategy (CGBS), and Monte Carlo EM(CEM).  $G$ : number of groups;  $n_y$ : number of outcomes in each group;  $n_x$ : number of exposures measured;  $\delta$ : between-group contrast;  $\sigma_b^2$ : between-subject variability;  $\sigma_\eta^2$ : measurement-error variability; bias =  $\frac{|\hat{\beta}_1 - \beta_1|}{\beta_1}$ ; MSE =  $E[(\hat{\beta}_1 - \beta_1)^2]$ .

Table 3: Empirical **bias** of  $\hat{\beta}_1$  (with empirical **MSE** in parentheses) in the logistic model when between-group contrast is 0.3.

| $\delta = 0.3$                                    | $\sigma_b^2$ | $\sigma_\eta^2$ | Naive        | GBS          | CGBS         | CEM          |
|---------------------------------------------------|--------------|-----------------|--------------|--------------|--------------|--------------|
| With full values ( $n_y = 30$ and $n_x = 30$ )    |              |                 |              |              |              |              |
| 0.3                                               | 0.25         |                 | 0.381(0.091) | 0.134(0.315) | 0.137(0.316) | 0.018(0.194) |
|                                                   | 0.50         |                 | 0.549(0.087) | 0.112(0.317) | 0.125(0.320) | 0.038(0.234) |
|                                                   | 0.75         |                 | 0.646(0.086) | 0.086(0.325) | 0.114(0.329) | 0.057(0.262) |
| 0.6                                               | 0.25         |                 | 0.284(0.064) | 0.167(0.313) | 0.174(0.315) | 0.010(0.103) |
|                                                   | 0.50         |                 | 0.439(0.063) | 0.138(0.318) | 0.159(0.320) | 0.005(0.144) |
|                                                   | 0.75         |                 | 0.542(0.064) | 0.108(0.330) | 0.147(0.330) | 0.023(0.183) |
| 0.9                                               | 0.25         |                 | 0.229(0.047) | 0.151(0.303) | 0.157(0.307) | 0.028(0.067) |
|                                                   | 0.50         |                 | 0.366(0.048) | 0.124(0.308) | 0.142(0.313) | 0.038(0.088) |
|                                                   | 0.75         |                 | 0.463(0.050) | 0.097(0.318) | 0.128(0.322) | 0.030(0.108) |
| With missing values ( $n_y = 30$ and $n_x = 20$ ) |              |                 |              |              |              |              |
| 0.3                                               | 0.25         | –               |              | 0.200(0.299) | 0.182(0.302) | 0.077(0.224) |
|                                                   | 0.50         | –               |              | 0.224(0.295) | 0.195(0.302) | 0.107(0.297) |
|                                                   | 0.75         | –               |              | 0.244(0.292) | 0.206(0.303) | 0.126(0.325) |
| 0.6                                               | 0.25         | –               |              | 0.270(0.288) | 0.242(0.301) | 0.071(0.128) |
|                                                   | 0.50         | –               |              | 0.297(0.280) | 0.259(0.300) | 0.073(0.173) |
|                                                   | 0.75         | –               |              | 0.322(0.272) | 0.274(0.299) | 0.078(0.223) |
| 0.9                                               | 0.25         | –               |              | 0.299(0.294) | 0.280(0.317) | 0.056(0.094) |
|                                                   | 0.50         | –               |              | 0.323(0.283) | 0.295(0.318) | 0.045(0.119) |
|                                                   | 0.75         | –               |              | 0.347(0.274) | 0.310(0.319) | 0.048(0.153) |
| With missing values ( $n_y = 30$ and $n_x = 10$ ) |              |                 |              |              |              |              |
| 0.3                                               | 0.25         | –               |              | 0.095(0.353) | 0.025(0.345) | 0.136(0.488) |
|                                                   | 0.50         | –               |              | 0.142(0.357) | 0.035(0.349) | 0.124(0.588) |
|                                                   | 0.75         | –               |              | 0.180(0.354) | 0.050(0.357) | 0.032(0.763) |
| 0.6                                               | 0.25         | –               |              | 0.158(0.373) | 0.031(0.370) | 0.181(0.375) |
|                                                   | 0.50         | –               |              | 0.219(0.368) | 0.051(0.378) | 0.231(0.454) |
|                                                   | 0.75         | –               |              | 0.251(0.343) | 0.057(0.386) | 0.273(0.636) |
| 0.9                                               | 0.25         | –               |              | 0.195(0.360) | 0.002(0.396) | 0.143(0.303) |
|                                                   | 0.50         | –               |              | 0.269(0.363) | 0.024(0.421) | 0.221(0.365) |
|                                                   | 0.75         | –               |              | 0.298(0.323) | 0.020(0.432) | 0.267(0.570) |

Empirical **bias** of  $\hat{\beta}_1$  (with empirical **MSE** in parentheses) in 200 simulations when the disease model is **logistic**, estimated by different methods: naive, group-based strategy (GBS), constrained group-based strategy (CGBS), and Monte Carlo EM(CEM).  $G$ : number of groups;  $n_y$ : number of outcomes in each group;  $n_x$ : number of exposures measured;  $\delta$ : between-group contrast;  $\sigma_b^2$ : between-subject variability;  $\sigma_\eta^2$ : measurement-error variability; bias =  $\frac{|\hat{\beta}_1 - \beta_1|}{\beta_1}$ ; MSE =  $E[(\hat{\beta}_1 - \beta_1)^2]$ .

Table 4: Empirical **bias** of  $\hat{\beta}_1$  (with empirical **MSE** in parentheses) in the logistic model when between-group contrast is 0.5.

| $\delta = 0.5$                                    | $\sigma_b^2$ | $\sigma_\eta^2$ | Naive        | GBS          | CGBS         | CEM          |
|---------------------------------------------------|--------------|-----------------|--------------|--------------|--------------|--------------|
| With full values ( $n_y = 30$ and $n_x = 30$ )    |              |                 |              |              |              |              |
| 0.3                                               | 0.25         |                 | 0.278(0.053) | 0.068(0.101) | 0.068(0.101) | 0.006(0.083) |
|                                                   | 0.50         |                 | 0.437(0.053) | 0.061(0.101) | 0.061(0.101) | 0.026(0.092) |
|                                                   | 0.75         |                 | 0.542(0.055) | 0.054(0.101) | 0.055(0.101) | 0.022(0.096) |
| 0.6                                               | 0.25         |                 | 0.215(0.042) | 0.103(0.100) | 0.103(0.100) | 0.001(0.058) |
|                                                   | 0.50         |                 | 0.349(0.043) | 0.095(0.100) | 0.096(0.100) | 0.007(0.071) |
|                                                   | 0.75         |                 | 0.445(0.045) | 0.087(0.100) | 0.089(0.100) | 0.023(0.079) |
| 0.9                                               | 0.25         |                 | 0.180(0.034) | 0.114(0.107) | 0.114(0.108) | 0.008(0.044) |
|                                                   | 0.50         |                 | 0.299(0.035) | 0.106(0.107) | 0.107(0.108) | 0.003(0.054) |
|                                                   | 0.75         |                 | 0.388(0.038) | 0.097(0.107) | 0.101(0.108) | 0.002(0.064) |
| With missing values ( $n_y = 30$ and $n_x = 20$ ) |              |                 |              |              |              |              |
| 0.3                                               | 0.25         | –               |              | 0.055(0.103) | 0.055(0.103) | 0.042(0.103) |
|                                                   | 0.50         | –               |              | 0.069(0.102) | 0.067(0.103) | 0.043(0.115) |
|                                                   | 0.75         | –               |              | 0.082(0.102) | 0.075(0.103) | 0.047(0.119) |
| 0.6                                               | 0.25         | –               |              | 0.110(0.103) | 0.107(0.103) | 0.055(0.081) |
|                                                   | 0.50         | –               |              | 0.124(0.102) | 0.118(0.103) | 0.055(0.093) |
|                                                   | 0.75         | –               |              | 0.138(0.102) | 0.125(0.103) | 0.056(0.105) |
| 0.9                                               | 0.25         | –               |              | 0.157(0.101) | 0.150(0.101) | 0.055(0.063) |
|                                                   | 0.50         | –               |              | 0.170(0.100) | 0.159(0.100) | 0.051(0.072) |
|                                                   | 0.75         | –               |              | 0.181(0.100) | 0.166(0.101) | 0.054(0.081) |
| With missing values ( $n_y = 30$ and $n_x = 10$ ) |              |                 |              |              |              |              |
| 0.3                                               | 0.25         | –               |              | 0.049(0.113) | 0.039(0.112) | 0.059(0.182) |
|                                                   | 0.50         | –               |              | 0.072(0.115) | 0.051(0.113) | 0.044(0.212) |
|                                                   | 0.75         | –               |              | 0.093(0.117) | 0.058(0.115) | 0.037(0.225) |
| 0.6                                               | 0.25         | –               |              | 0.078(0.110) | 0.051(0.109) | 0.089(0.161) |
|                                                   | 0.50         | –               |              | 0.101(0.112) | 0.061(0.110) | 0.109(0.206) |
|                                                   | 0.75         | –               |              | 0.121(0.114) | 0.066(0.112) | 0.110(0.219) |
| 0.9                                               | 0.25         | –               |              | 0.103(0.114) | 0.063(0.112) | 0.087(0.134) |
|                                                   | 0.50         | –               |              | 0.127(0.117) | 0.072(0.115) | 0.134(0.194) |
|                                                   | 0.75         | –               |              | 0.149(0.118) | 0.076(0.118) | 0.154(0.239) |

Empirical bias of  $\hat{\beta}_1$  (with empirical MSE in parentheses) in 200 simulations when the disease model is **logistic**, estimated by different methods: naive, group-based strategy (GBS), constrained group-based strategy (CGBS), and Monte Carlo EM(CEM).  $G$ : number of groups;  $n_y$ : number of outcomes in each group;  $n_x$ : number of exposures measured;  $\delta$ : between-group contrast;  $\sigma_b^2$ : between-subject variability;  $\sigma_\eta^2$ : measurement-error variability; bias =  $\frac{|\hat{\beta}_1 - \beta_1|}{\beta_1}$ ; MSE =  $E[(\hat{\beta}_1 - \beta_1)^2]$ .
